# Supplementary material for: Expression of the Human Herpesvirus 6A Latency-Associated Transcript U94A Disrupts Human Oligodendrocyte Progenitor Migration
Source: PubMed Central journal article supplement (PMC5479784; doi:10.1038/s41598-017-04432-y), 2017-06-21

**Expression of the Human Herpesvirus 6A Latency-Associated  
Transcript U94 Disrupts Human Oligodendrocyte Progenitor  
Migration**

Campbell A<sup>#</sup>, Hogestyn J<sup>#</sup>, Folts C, Lopez B, Proschel C, Mock D and M. Mayer-  
Proschel\*

Supplementary Information – Figure 2a U94A nested PCR

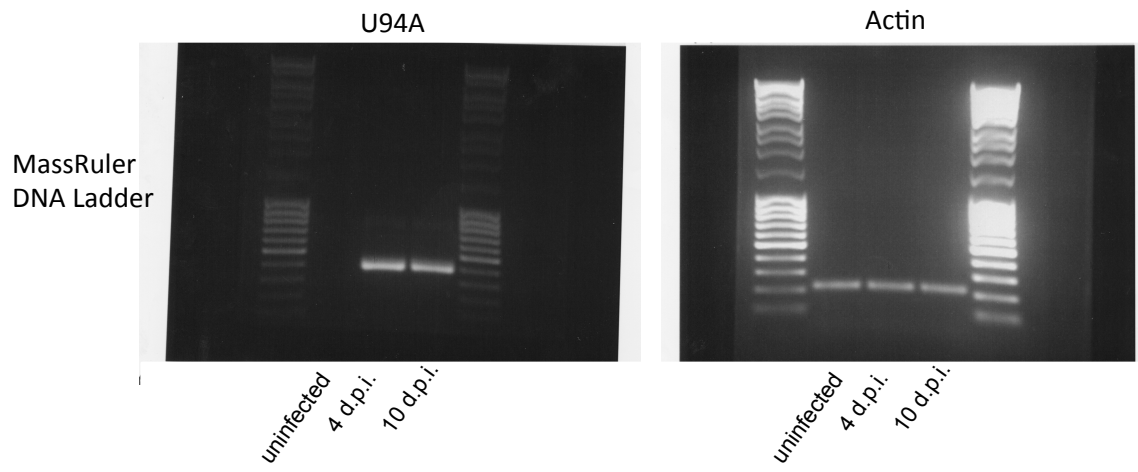

Supplement: 41598_2017_4432_MOESM1_ESM.pdf [file 41598_2017_4432_MOESM1_ESM.pdf]
